# Supplementary material
Source: PubMed Central journal article supplement (PMC10563515)

Supplemental Figure 1. Respondent-reported cannabinoid-induced changes in pain.

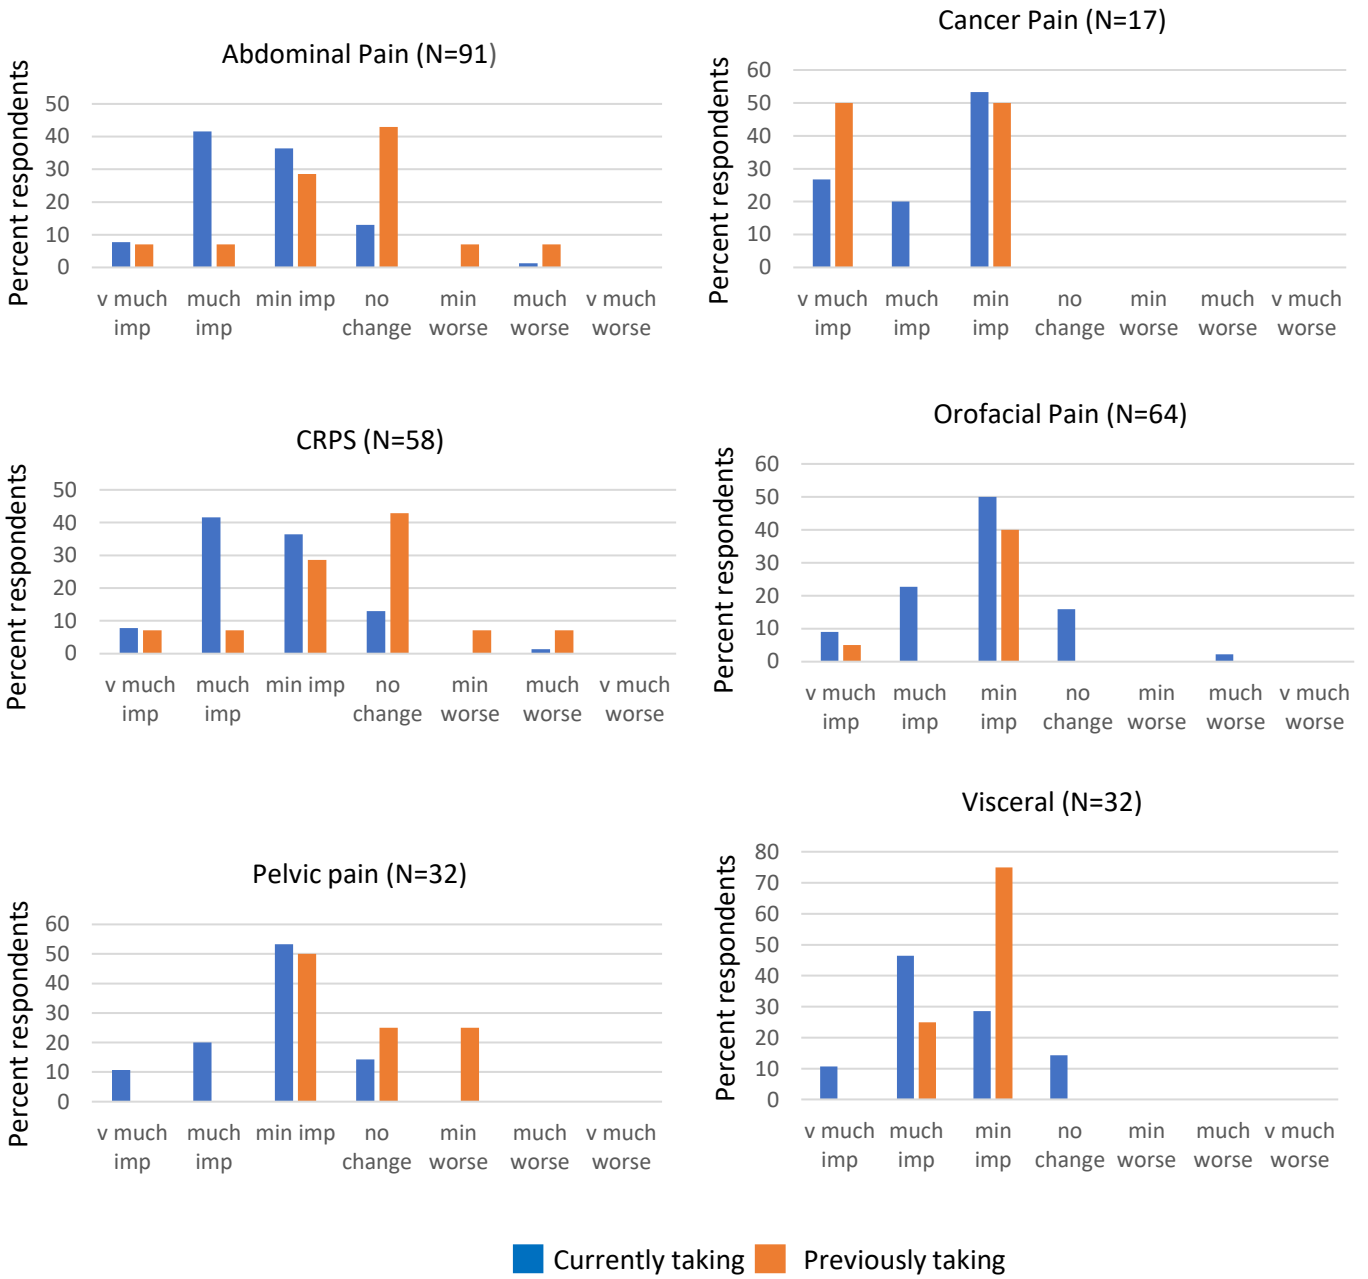

Supplement: NIHMS1928171-supplement-Supplemental_Figure_1.pdf [file NIHMS1928171-supplement-Supplemental_Figure_1.pdf]
